# Supplementary material for: Targeting JNK for therapeutic depletion of stem-like glioblastoma cells
Source: PubMed Central journal article supplement — Sci Rep. 2012 Jul 19;2:516. doi: 10.1038/srep00516 (PMC3400080; doi:10.1038/srep00516), 2012-07-19
Supplement: srep00516-s1.pdf [file srep00516-s1.pdf]

## Supplementary Information for:

### Targeting JNK for therapeutic depletion of stem-like glioblastoma cells

Ken-ichiro Matsuda<sup>1,2#</sup>, Atsushi Sato<sup>1,2\*#</sup>, Masashi Okada<sup>1</sup>, Keita Shibuya<sup>1</sup>, Shizuka Seino<sup>1</sup>, Kaori Suzuki<sup>1,3</sup>, Eriko Watanabe<sup>1</sup>, Yoshitaka Narita<sup>3</sup>, Soichiro Shibui<sup>3</sup>, Takamasa Kayama<sup>2</sup>, Chifumi Kitanaka<sup>1,4,5\*</sup>

Departments of<sup>1</sup>Molecular Cancer Science and <sup>2</sup>Neurosurgery, Yamagata University School of Medicine, Yamagata, 990-9585, Japan

<sup>3</sup>Neurosurgery Division, National Cancer Center Hospital, Tokyo, 104-0045, Japan

<sup>4</sup>Oncology Research Center, Research Institute for Advanced Molecular Epidemiology, Yamagata University, Yamagata, 990-9585, Japan

<sup>5</sup>Global COE program for Medical Sciences, Japan Society for Promotion of Science, Tokyo, 102-8472, Japan

\*Corresponding Authors: Chifumi Kitanaka and Atsushi Sato

Department of Molecular Cancer Science, Yamagata University School of Medicine, Yamagata,

990-9585, Japan. Tel: +81-23-628-5212; Fax: +81-23-628-5215

E-mail: ckitanak@med.id.yamagata-u.ac.jp, asato@med.id.yamagata-u.ac.jp

#These authors contributed equally to this work

**SUPPLEMENTARY FIGURES**

**Supplementary Figure 1**

**a**

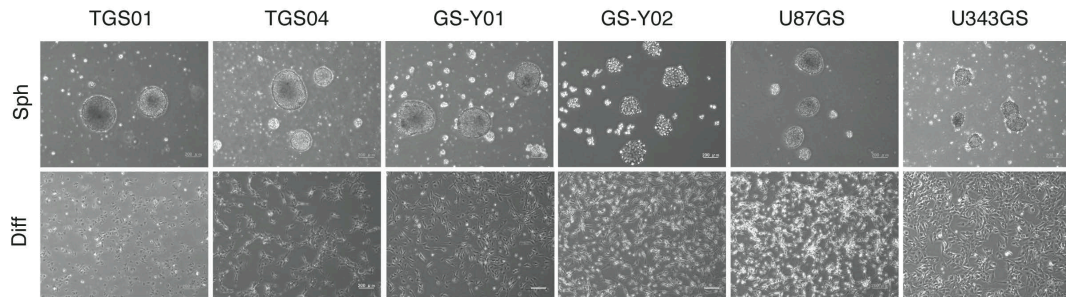

**b**

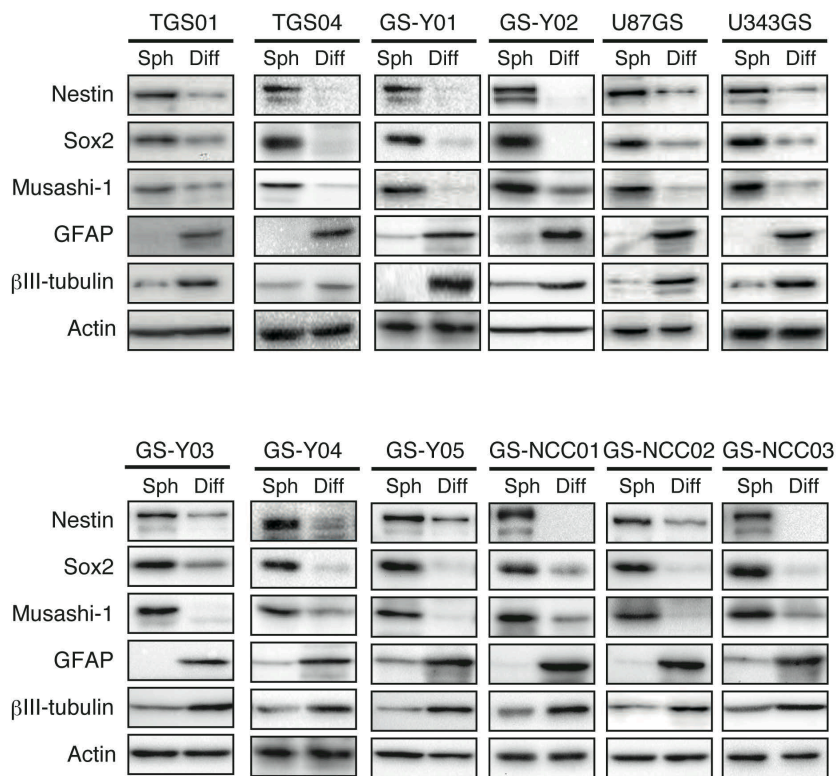

## Supplementary Figure 1

**Self-renewal capacity and multi-lineage differentiation potential of stem-like glioblastoma cells used in this study.**

(a) Phase-contrast micrographs of stem-like glioblastoma cells cultured in the sphere culture condition (*top*, Sph) and in the differentiation-inducing culture condition (*bottom*, Diff). Scale bars, 200  $\mu\text{m}$ .

(b) Immunoblot analysis of stem cell and differentiation-marker expression in stem-like glioblastoma cells cultured in the sphere culture condition (*left lanes*, Sph) and in the differentiation-inducing culture condition for 7 days (*right lanes*, Diff).

## Supplementary Figure 2

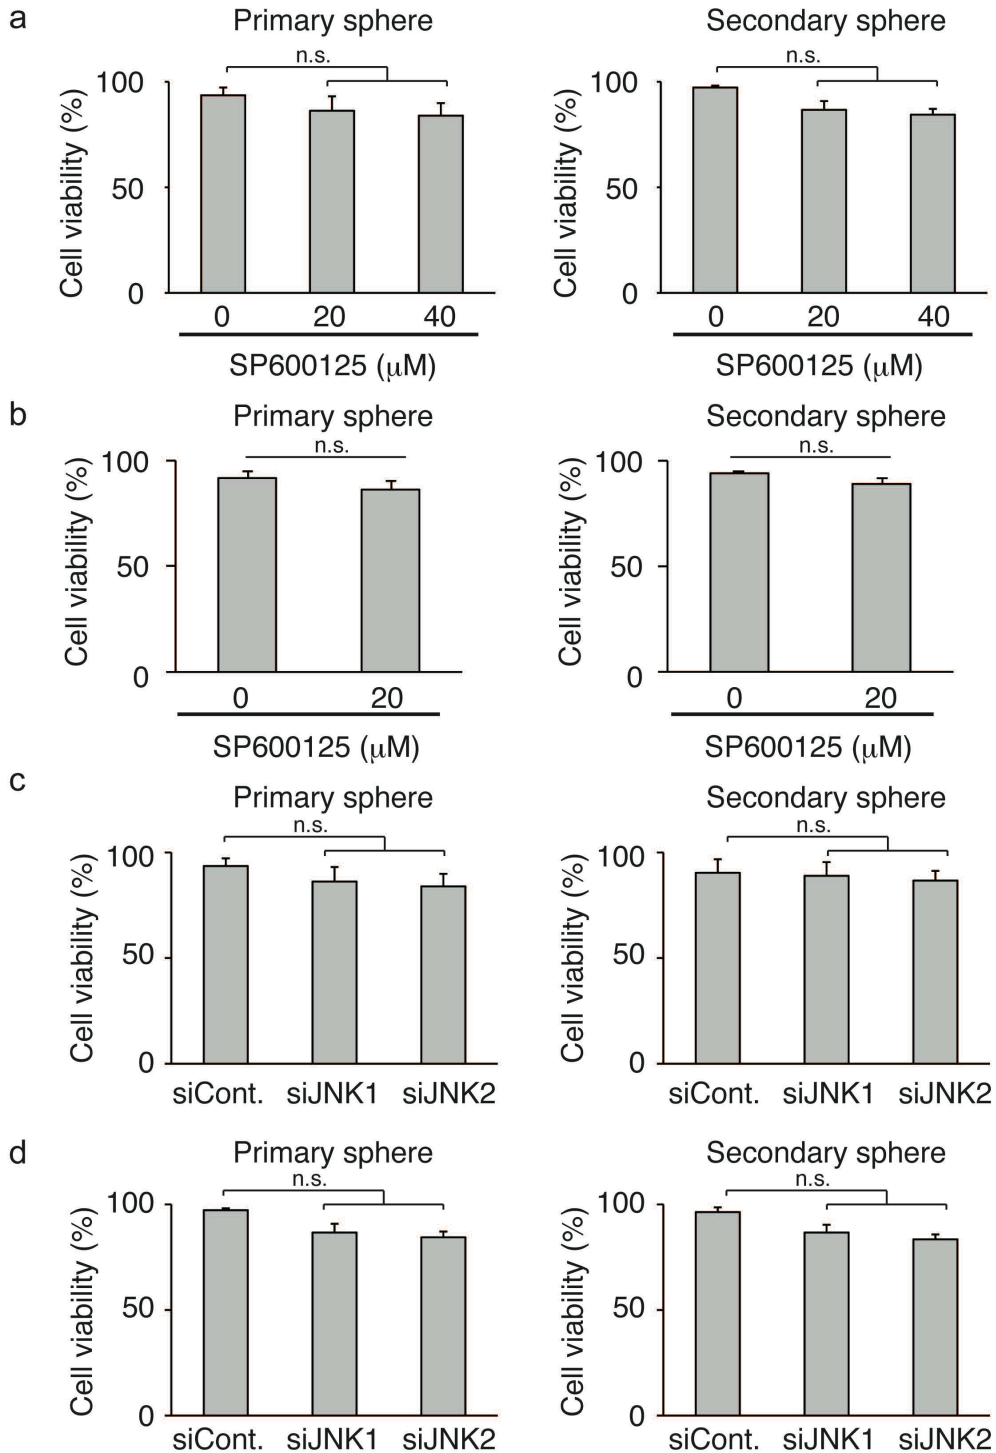

## **Supplementary Figure 2**

### **Effect of JNK inhibition on viability of TGS01 and GS-Y01 stem-like glioblastoma cells.**

Cellular viability of TGS01 (**a, c**) and GS-Y01 (**b, d**) cells analysed in the serial sphere formation assays of Fig. 2**a** and Fig. 2**e** was examined using the dye exclusion method. Values represent mean  $\pm$  s.d. from 3 experiments. n.s., not statistically significant.

### Supplementary Figure 3

a

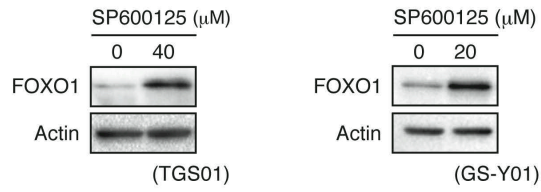

b

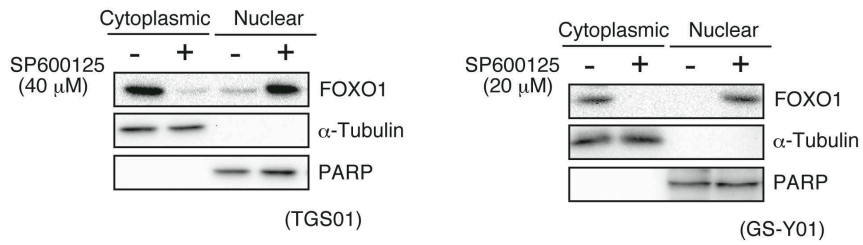

c

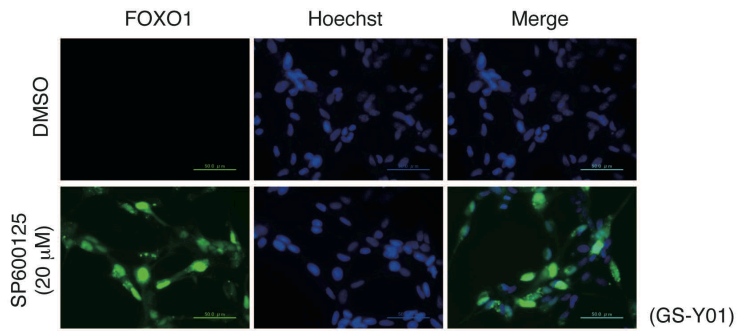

d

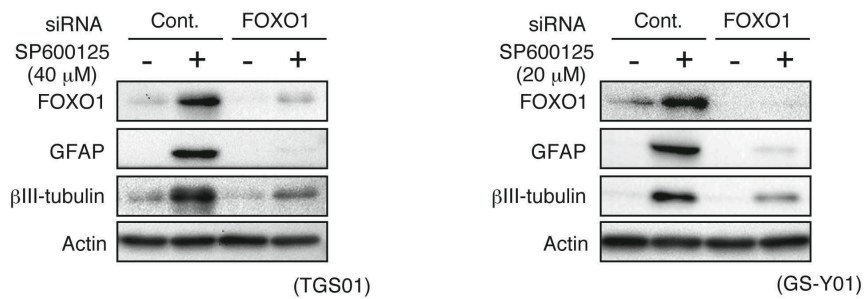

### Supplementary Figure 3

#### **JNK prevents stem-like glioblastoma cell differentiation via inhibition of FOXO1 activation.**

(a) TGS01 and GS-Y01 cells cultured in the absence or presence of the indicated concentrations of SP600125 for 3 days were analysed for FOXO1 expression by immunoblot analysis.

(b) TGS01 and GS-Y01 cells treated as in (a) were subjected to cellular fractionation followed by immunoblot analysis for FOXO1 as well as for cytoplasmic ( $\alpha$ -tubulin) and nuclear (PARP) marker proteins.

(c) GS-Y01 cells cultured in the presence of SP600125 or the control vehicle (DMSO) for 3 days were subjected to immunofluorescence staining of FOXO1 (green). Nuclei were counterstained with Hoechst 33342 (blue). Scale bars, 50.0  $\mu$ m.

(d) TGS01 and GS-Y01 cells transfected with the control (Cont.) or FOXO1 siRNA were treated with or without SP600125 for 3 days beginning 6 h after transfection. Cells were then subjected to immunoblot analysis with the indicated antibodies.

## Supplementary Figure 4

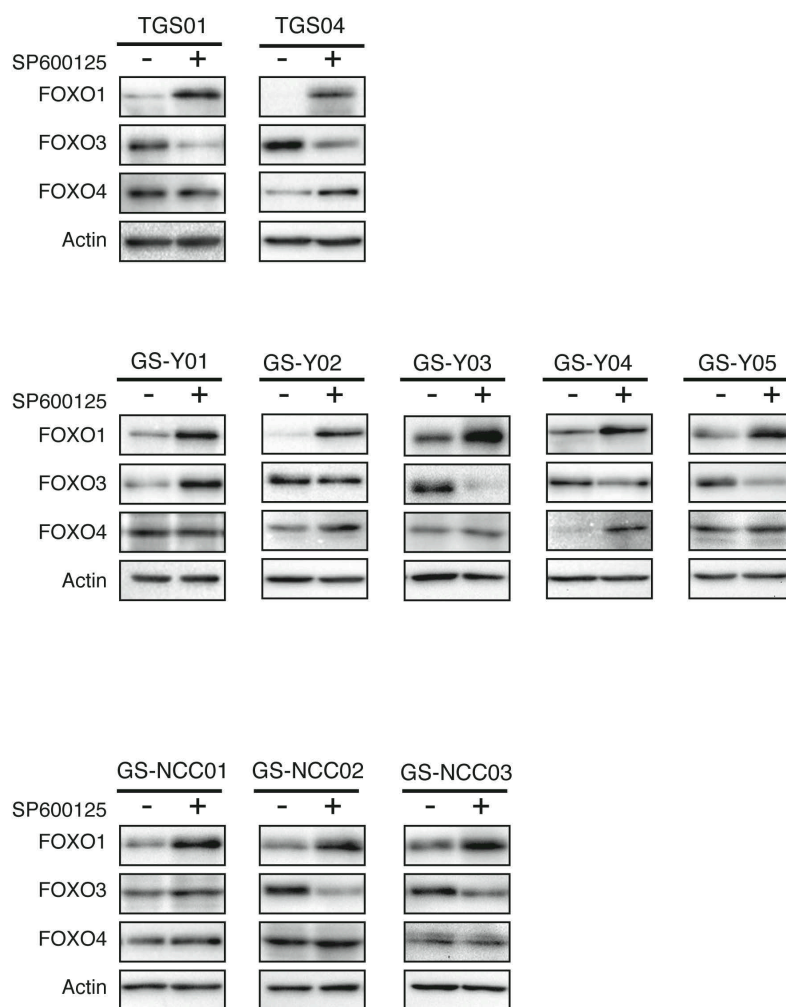



#### **Supplementary Figure 4**

##### **Effect of JNK inhibition on expression of FOXO transcription factors in stem-like glioblastoma cells.**

The indicated stem-like glioblastoma cells were treated with or without SP600125 (40  $\mu$ M for TGS01 and 20  $\mu$ M for the others) for 3 days and then subjected to immunoblot analysis for the expression of FOXO family members.

**Supplementary Figure 5**

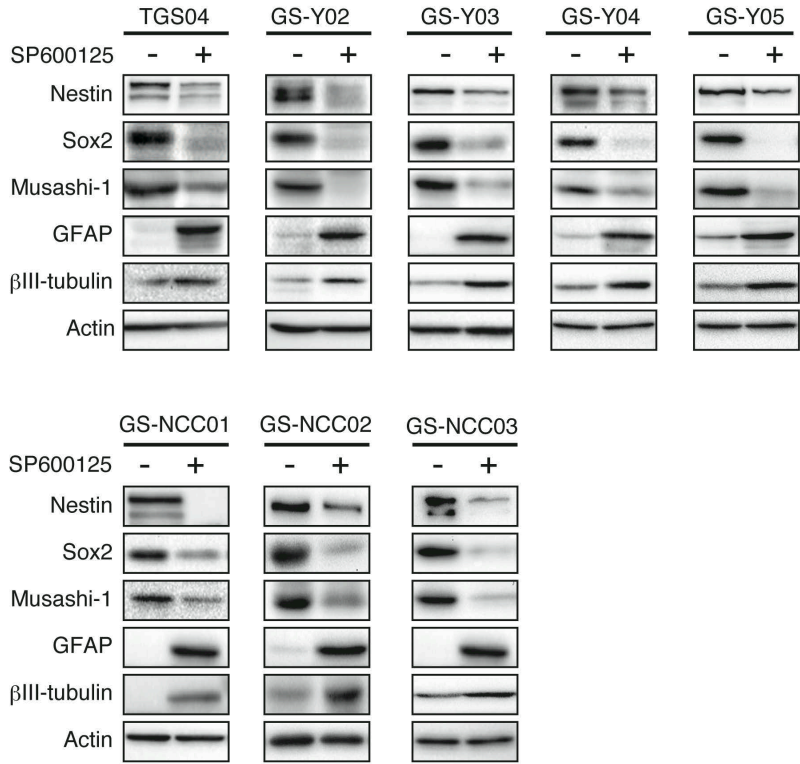

**Supplementary Figure 5**

**JNK activity is required for maintenance of undifferentiated state in stem-like glioblastoma cells.**

The indicated stem-like glioblastoma cells treated with or without SP600125 (20  $\mu$ M) for 3 days were subjected to immunoblot analysis for stem cell and differentiation-marker expression.

## Supplementary Figure 6

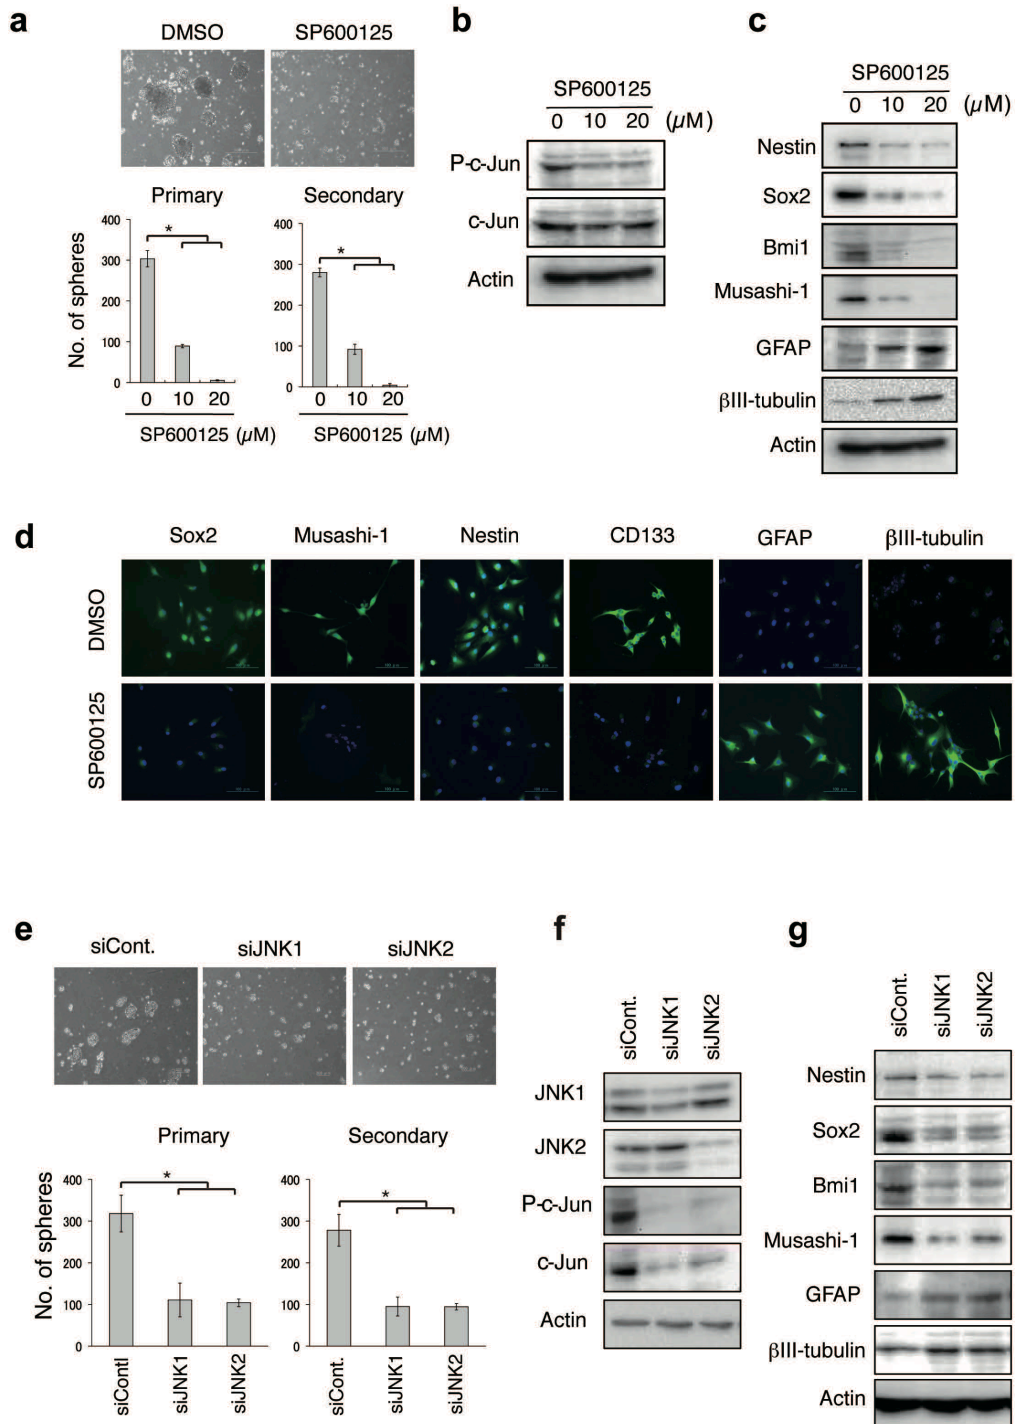

## Supplementary Figure 6

### **JNK is required for maintenance of stem-like cells (U87GS) derived from the U87 human glioblastoma cell line.**

(a) U87GS cells cultured in the presence of the indicated concentrations of SP600125 for 3 days were subjected to primary and secondary sphere formation assays. The data are presented as the number of tumourspheres formed (mean  $\pm$  s.d. from 3 experiments, *bottom*). Representative phase-contrast micrographs of the primary spheres formed by cells treated with SP600125 (20  $\mu$ M) and the control vehicle (DMSO) are shown (*top*). Scale bars, 500  $\mu$ m. \* $P$  < 0.05

(b - c) Immunoblot analysis of phospho-c-Jun (P-c-Jun) (b) and stem cell/differentiation-marker (c) expression after treatment of U87GS cells with the indicated concentrations of SP600125 for 3 days.

(d) U87GS cells treated with SP600125 (20  $\mu$ M) or the control vehicle (DMSO) were subjected to immunofluorescence analysis for the expression of the indicated stem cell and differentiation markers. Scale bars, 100  $\mu$ m.

(e) U87GS cells transfected with the indicated siRNAs were subjected to primary and secondary sphere formation assays 3 days after transfection. The data are presented as the number of tumourspheres formed (mean  $\pm$  s.d. from 3 experiments, *bottom*). Representative phase-contrast micrographs of the primary sphere assay are shown (*top*). Scale bars, 200  $\mu$ m. \* $P$  < 0.05

(f) Effect of JNK knockdown on the JNK signalling pathway in U87GS cells.

(g) Effect of JNK knockdown on stem cell and differentiation-marker expression in U87GS cells.

## Supplementary Figure 7

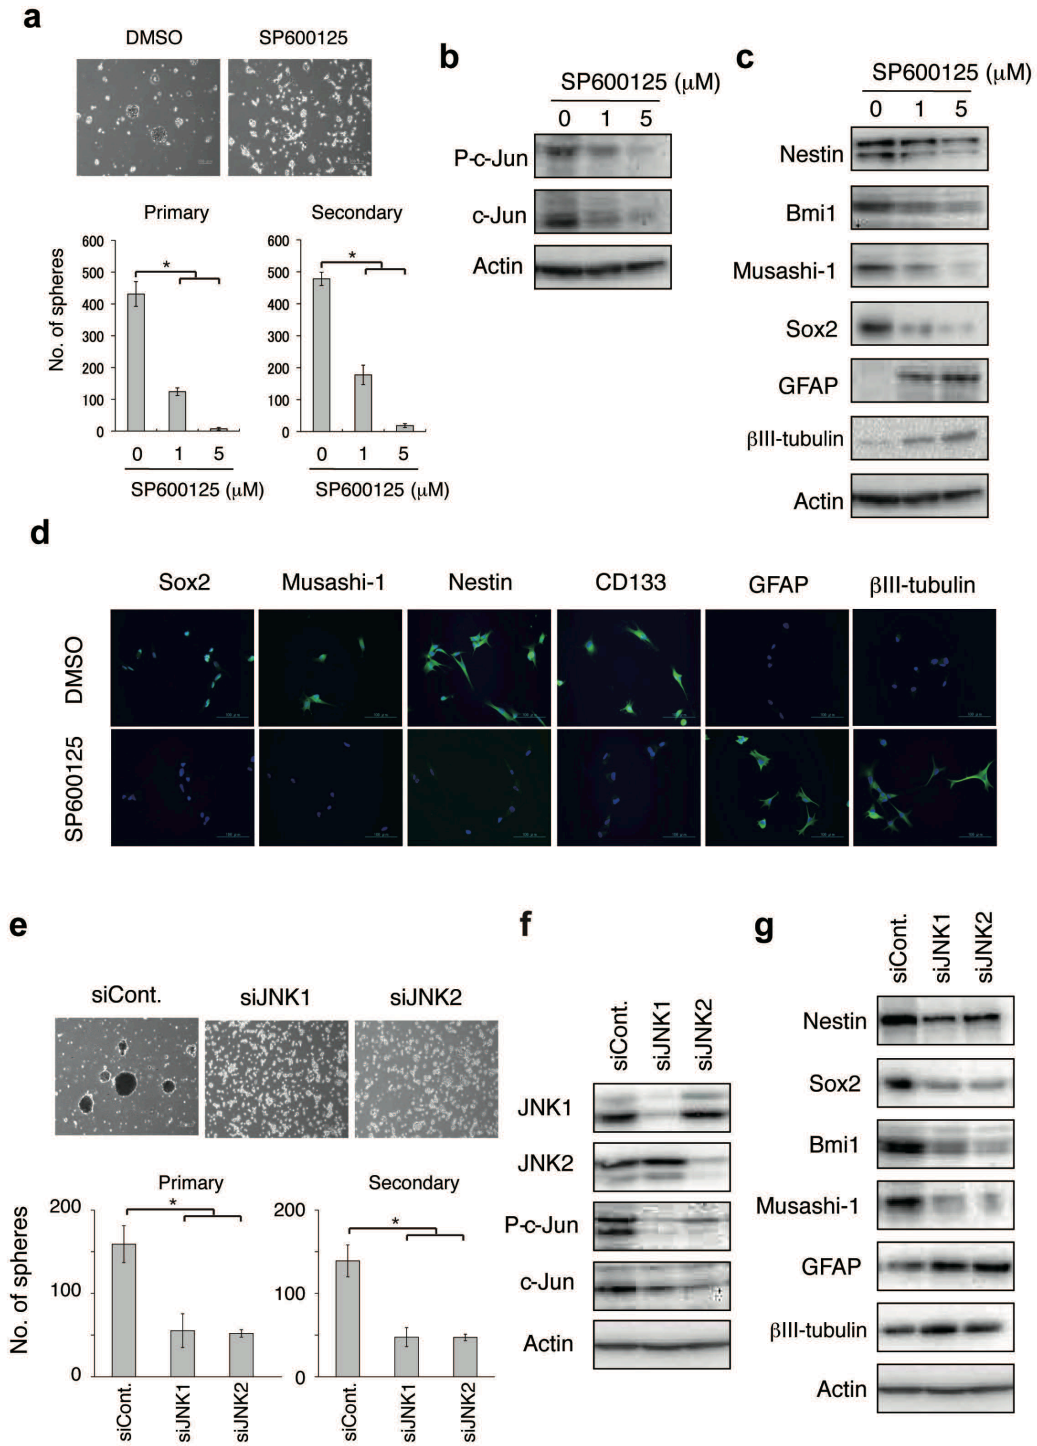

## Supplementary Figure 7

### **JNK is required for maintenance of stem-like cells (U343GS) derived from the U343 human glioblastoma cell line.**

(a) U343GS cells cultured in the presence of the indicated concentrations of SP600125 for 3 days were subjected to primary and secondary sphere formation assays. The data are presented as the number of tumourspheres formed (mean  $\pm$  s.d. from 3 experiments, *bottom*). Representative phase-contrast micrographs of the primary spheres formed by cells treated with SP600125 (5  $\mu$ M) and the control vehicle (DMSO) are shown (*top*). Scale bars, 200  $\mu$ m. \* $P$  < 0.05

(b - c) Immunoblot analysis of phospho-c-Jun (P-c-Jun) (b) and stem cell/differentiation-marker (c) expression after treatment of U343GS cells with the indicated concentrations of SP600125 for 3 days.

(d) U343GS cells treated with SP600125 (5  $\mu$ M) or the control vehicle (DMSO) were subjected to immunofluorescence analysis for the expression of the indicated stem cell and differentiation markers. Scale bars, 100  $\mu$ m.

(e) U343GS cells transfected with the indicated siRNAs were subjected to primary and secondary sphere formation assays 3 days after transfection. The data are presented as the number of tumourspheres formed (mean  $\pm$  s.d. from 3 experiments, *bottom*). Representative phase-contrast micrographs of the primary sphere assay are shown (*top*). Scale bars, 200  $\mu$ m. \* $P$  < 0.05

(f) Effect of JNK knockdown on the JNK signalling pathway in U343GS cells.

(g) Effect of JNK knockdown on stem cell and differentiation-marker expression in U343GS cells.

Supplementary Figure 8

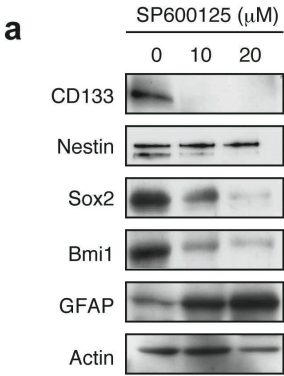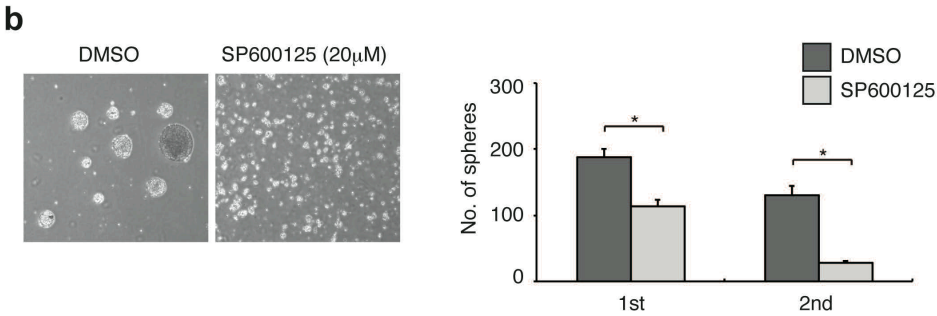



## Supplementary Figure 8

### **Effect of JNK inhibition on glioblastoma cell cultures propagated under the stem cell culture condition as self-renewing spheres for brief periods but from which cell lines were not established.**

(a) Tumourspheres derived directly from a surgical specimen of a glioblastoma patient and formed under the sphere culture condition were dissociated and cultured in the presence of the indicated concentrations of SP600125 for 3 days under the sphere culture condition and then subjected to immunoblot analysis for stem cell (CD133, nestin, Sox2, and Bmi1) and differentiation (GFAP)-marker expression.

(b) Tumourspheres derived directly from a surgical specimen of another glioblastoma patient were dissociated, cultured in the absence (DMSO) or presence of SP600125 (20  $\mu$ M) for 3 days, and then subjected to serial sphere formation assays in the absence of SP600125. Representative phase-contrast micrographs of the cells are shown (*left*). Values in the graph represent mean  $\pm$  s.d. of triplicate cultures (*right*). \* $P < 0.05$

Note that tumourspheres in (a) and (b) ultimately failed to be established as stem-like glioblastoma cell lines.

## Supplementary Figure 9

**a**

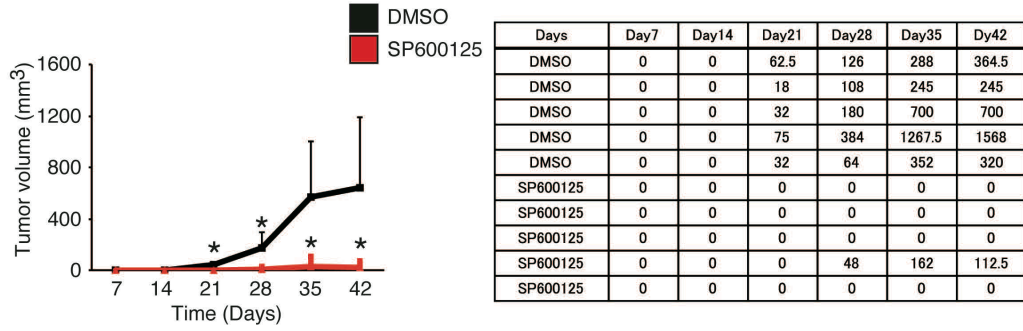

**b**

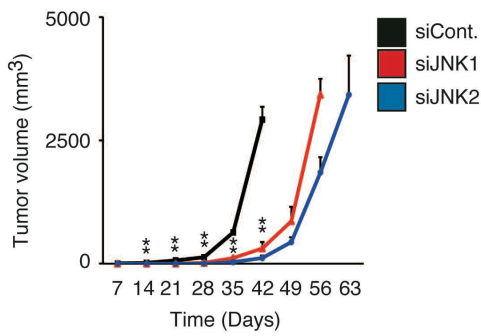

**c**

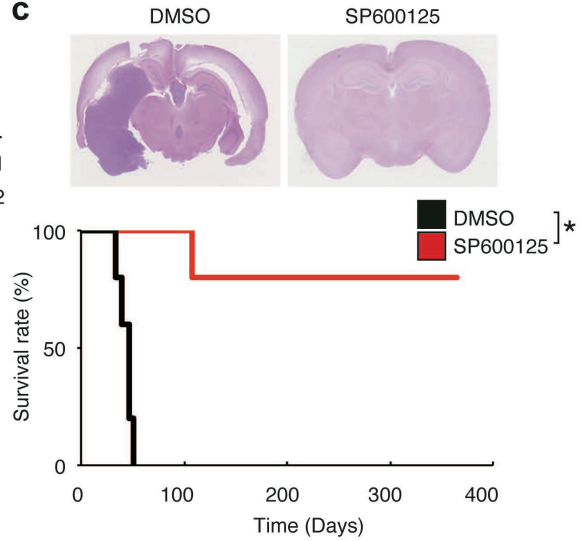

**d**

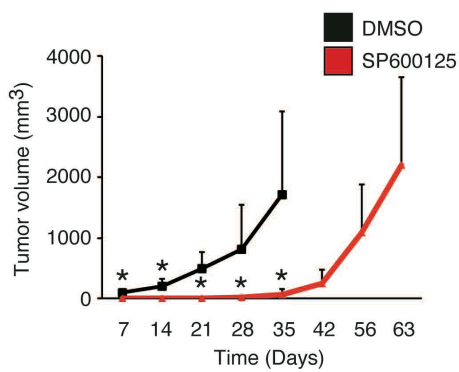

**e**

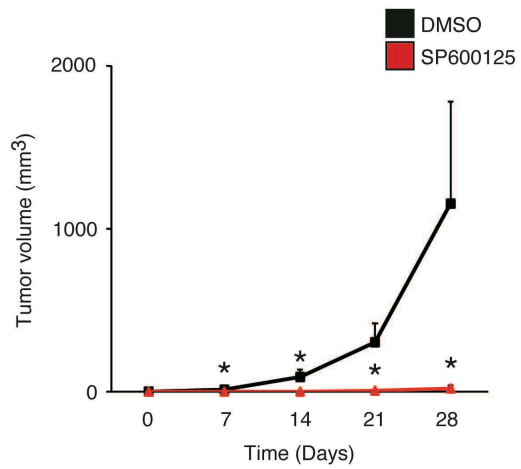

## Supplementary Figure 9

### Transient JNK inhibition suppresses tumour-initiating potential of stem-like U87GS cells *in vitro* and *in vivo*.

(a) Mice were implanted subcutaneously with stem-like U87GS cells ( $1 \times 10^5$  cells) pretreated with SP600125 (20  $\mu$ M) or the control vehicle (DMSO) for 3 days (5 mice per group). Tumour volume ( $\text{mm}^3$ ) measured at the indicated time points is presented in the graph as mean tumour volume  $\pm$  s.d. (*left*) and in the table (*right*).  $*P < 0.05$

(b) U87GS cells ( $1 \times 10^5$ ) transiently transfected with siRNAs against JNK1 or JNK2, or with a control siRNA were implanted subcutaneously into the right flank of mice 3 days after transfection (3 mice per group). Data were then collected and analysed as in (a).  $*P < 0.05$

(c) A Kaplan-Meier plot (*bottom*) showing survival of mice (5 mice per group) after intracranial implantation of U87GS cells ( $1 \times 10^4$ ) pretreated with SP600125 (20  $\mu$ M) or the control vehicle (DMSO) for 3 days. Representative haematoxylin and eosin staining of the brain sections from mice sacrificed at 50 days after implantation is shown (*top*).  $*P < 0.05$

(d) Mice implanted subcutaneously with U87GS ( $1 \times 10^5$  cells) were randomly assigned into control and SP600125 treatment groups (3 mice per group) for intraperitoneal injection of the control vehicle (DMSO) or SP600125 (40 mg/kg/day), respectively, for 5 days starting on the next day of implantation. Tumour volume was measured at the indicated time points (mean  $\pm$  s.d. of 3 mice).  $*P < 0.05$

(e) Mice implanted subcutaneously with U87GS ( $1 \times 10^5$  cells) were, after tumour formation, randomized into control and SP600125 treatment groups (3 mice per group; tumour volume at randomization, 171 – 288  $\text{mm}^3$ ) for intraperitoneal injection of the control vehicle (DMSO) or SP600125 (40 mg/kg/day),

respectively, for 5 days. On the next day of the final drug treatment, the mice were sacrificed and dissociated tumour cells ( $1 \times 10^5$  cells per mouse) were transplanted subcutaneously into the right flank of mice (5 mice per group). Tumour volume was measured at the indicated time points (mean  $\pm$  s.d. of 5 mice). \* $P < 0.05$

## Supplementary Figure 10

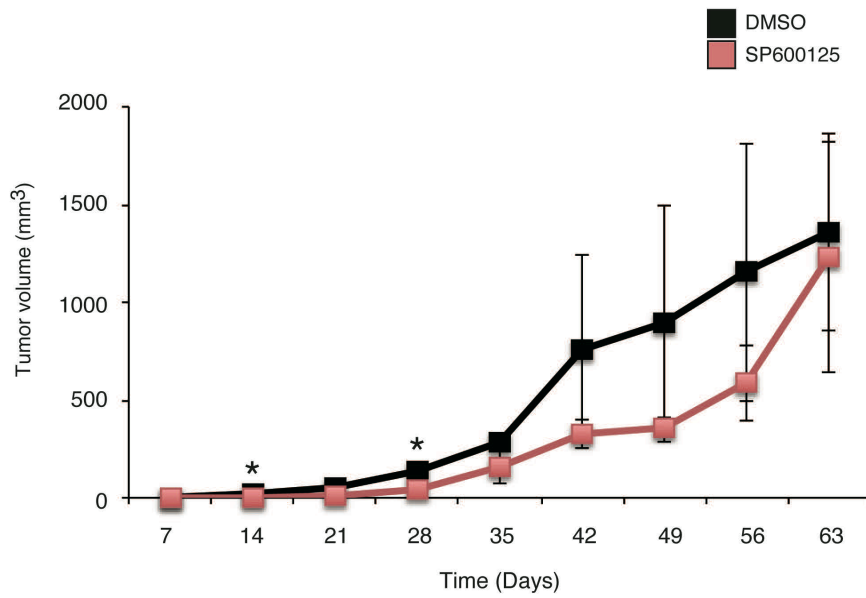

| Day      | Day7 | Day14 | Day21 | Day28 | Day35 | Day42  | Day49 | Day56  | Day63  |
|----------|------|-------|-------|-------|-------|--------|-------|--------|--------|
| Contol   | 0    | 13.5  | 36    | 126   | 288   | 700    | 700   | 847    | 936    |
| Contol   | 2    | 18    | 30    | 108   | 245   | 1267.5 | 1568  | 1912.5 | 1224   |
| Contol   | 6    | 27.5  | 87.5  | 180   | 320   | 320    | 405   | 700    | 1912.5 |
| SP600125 | 0    | 6     | 13.5  | 32    | 180   | 245    | 320   | 364.5  | 936    |
| SP600125 | 0    | 4     | 6     | 75    | 245   | 384    | 352   | 700    | 1912.5 |
| SP600125 | 0    | 4     | 18    | 32    | 64    | 352    | 416   | 700    | 847    |

## Supplementary Figure 10

### **Marginal inhibitory effect of JNK inhibition on tumour-initiating potential of serum-cultured U87 cells.**

Serum-cultured U87 cells ( $1 \times 10^6$  cells) pretreated with SP600125 (20  $\mu$ M) or the control vehicle (DMSO) for 3 days were implanted subcutaneously into the right flank of mice (3 mice per group), and tumour volume ( $\text{mm}^3$ ) was measured at the indicated time points. The data are presented in the graph as mean tumour volume  $\pm$  s.d. of 3 mice (*top*) and in the table (*bottom*). \* $P < 0.05$

## Supplementary Figure 11

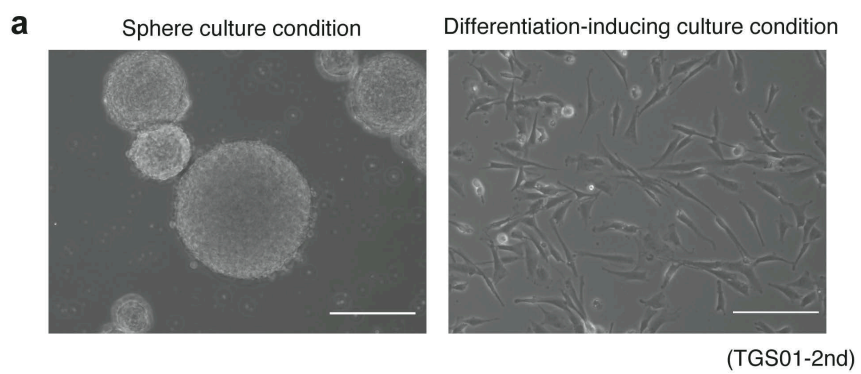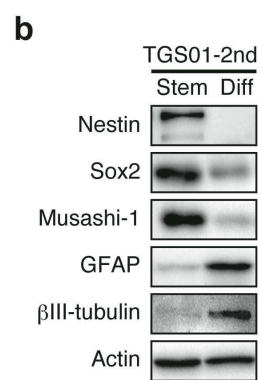

## Supplementary Figure 11

**Tumour xenografts established from stem-like glioblastoma cells contain stem-like glioblastoma cells with self-renewal capacity and multipotency of differentiation.**

(a) Stem-like glioblastoma cells isolated from subcutaneous tumours established by implantation of TGS01 cells and maintained under the monolayer stem cell culture condition (TGS01-2<sup>nd</sup>) were transferred and cultured in the sphere culture condition (*left*) and in the differentiation-inducing culture condition (*right*). Representative phase-contrast photomicrographs of the cells are shown. Scale bars, 200  $\mu\text{m}$ .

(b) TGS01-2<sup>nd</sup> cells maintained under the monolayer stem cell culture condition (Stem) and cultured in the differentiation-inducing culture condition for 1 week (Diff) were subjected to immunoblot analysis for the indicated stem cell and differentiation markers.



## Supplementary Figure 12

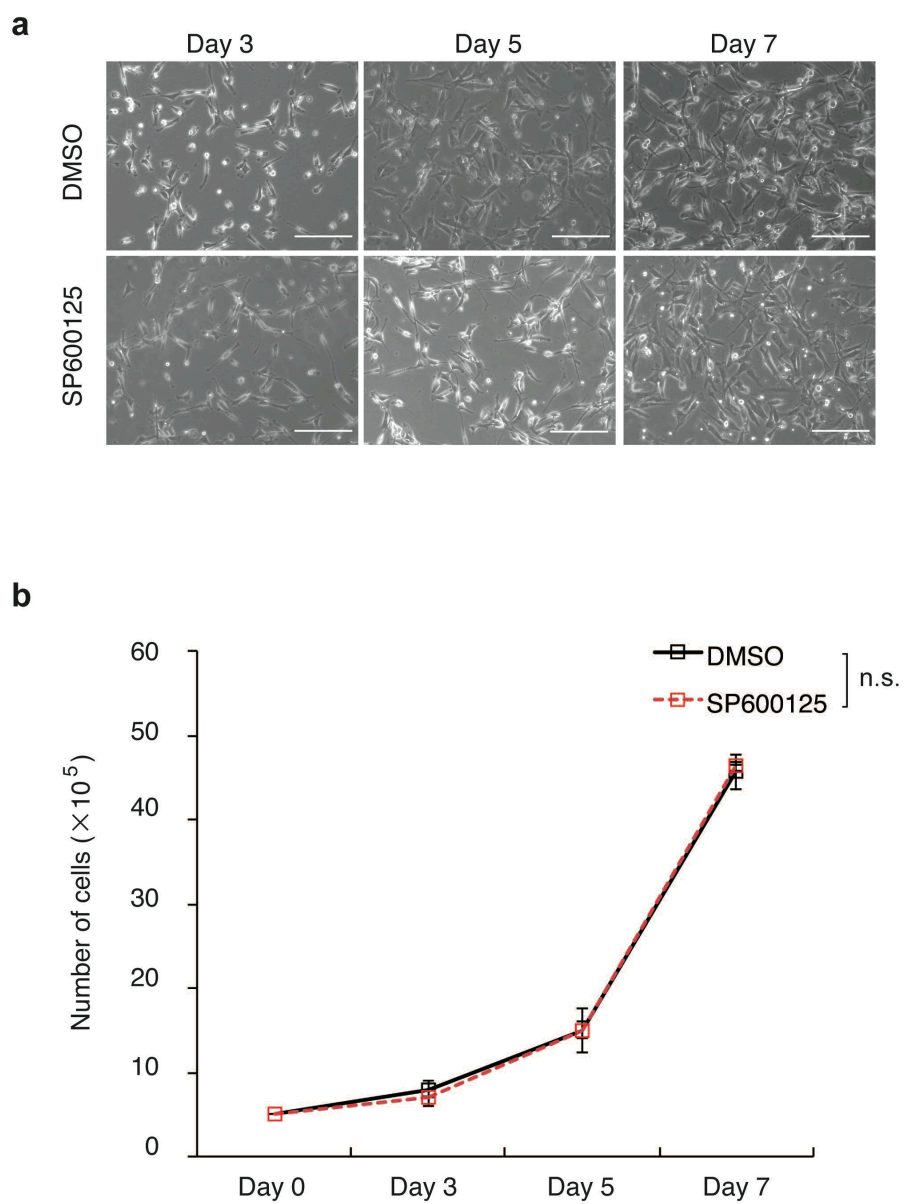

## Supplementary Figure 12

**Transient inhibition of JNK in vivo, which depletes the self-renewing and tumour-initiating glioblastoma cell populations from established tumours, does not affect the growth of bulk tumour cells under the serum culture condition in vitro.**

(a - b) Mice implanted subcutaneously with stem-like glioblastoma cells (TGS01,  $1 \times 10^6$  cells) were, after tumour formation, randomized into control and SP600125 treatment groups (3 mice per group; tumour volume at randomization, 171 – 288 mm<sup>3</sup>) and administered intraperitoneal injection of the control vehicle (DMSO) or SP600125 (40 mg/kg/day), respectively, for 5 days. On the next day of the final drug treatment (= Day 0), mice were sacrificed and dissociated tumour cells were cultured in the presence of serum (i.e., under the differentiation-inducing culture condition). Phase-contrast photomicrographs (a) and growth curves (b) of the cells are shown. Scale bars in (a), 200  $\mu$ m. Values in (b) represent mean  $\pm$  s.d. of triplicate cultures. n.s., not statistically significant.

## Supplementary Figure 13

**a**

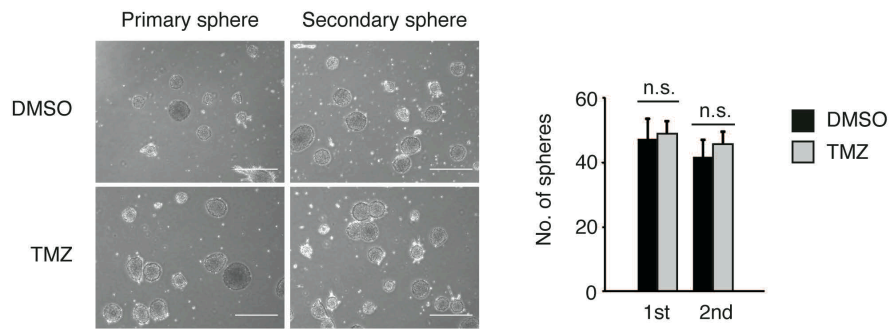

**b**

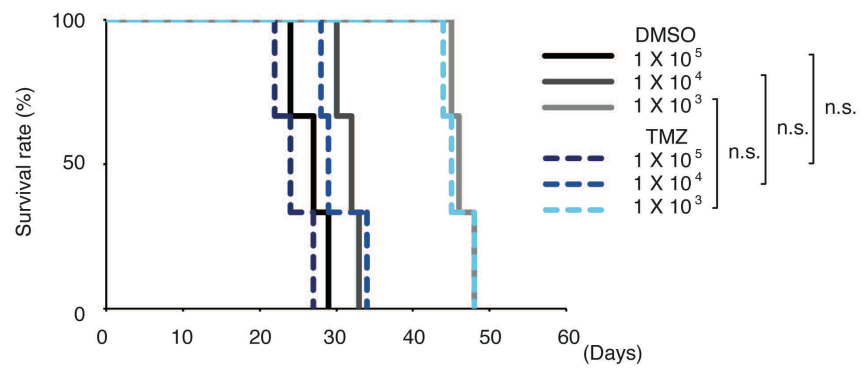

### Supplementary Figure 13

#### **Administration of a sublethal dose of temozolomide fails to decrease self-renewing and tumour-initiating glioblastoma cell populations in established tumours in vivo.**

(a - b) Mice implanted subcutaneously with stem-like glioblastoma cells (TGS01,  $1 \times 10^6$  cells) were, after tumour formation, randomized into control and temozolomide (TMZ) treatment groups (3 mice per group; tumour volume at randomization, 144 – 256 mm<sup>3</sup>) and administered intraperitoneal injection of the control vehicle (DMSO) or TMZ (50 mg/kg/day), respectively, for 5 days. On the next day of the final drug treatment, mice were sacrificed and dissociated tumour cells were subjected to serial sphere formation assays (a). *Left*, phase-contrast micrographs of the spheres (scale bars, 200  $\mu$ m). *Right*, number of the spheres formed (mean  $\pm$  s.d. of triplicate cultures derived from a single tumour of each treatment group). Essentially identical results were obtained regarding the remaining 2 tumours of each group. Alternatively, serial dilutions of the dissociated tumour cells were transplanted intracranially into mice (b), and survival was evaluated by Kaplan-Meier analysis (3 mice per group). Note that a higher dose of TMZ (e.g., 60 mg/kg/day) frequently caused death of mice relatively soon after drug administration in the experimental condition. n.s., not statistically significant.

**Supplementary Figure 14**

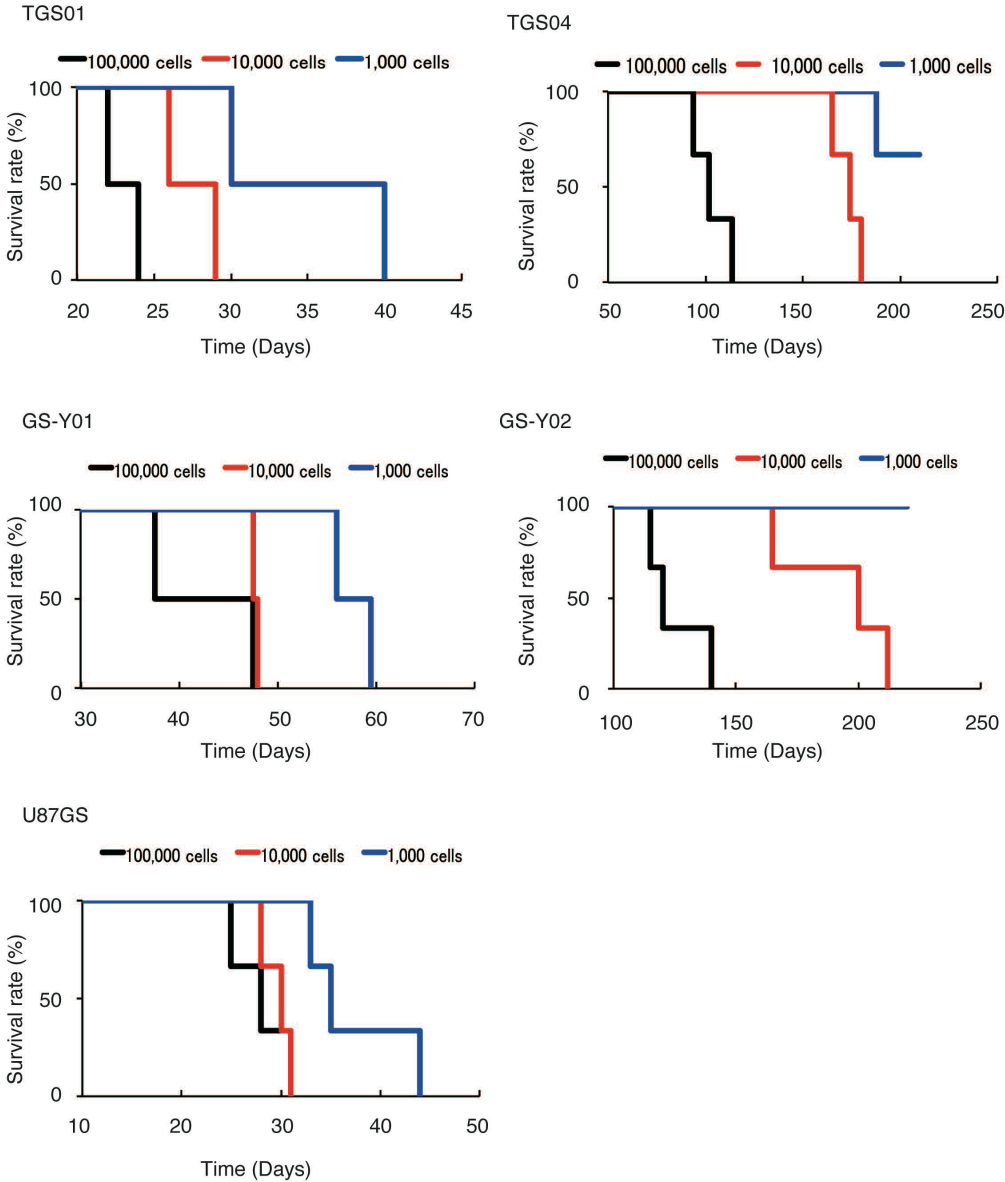

**Supplementary Figure 14**

**Relationship between number of implanted cells and mouse survival in the intracranial xenograft model.**

Kaplan-Meier plots showing survival duration of mice implanted intracranially with serial dilutions of the indicated stem-like glioblastoma cells.

## Supplementary Figure 15

**a**

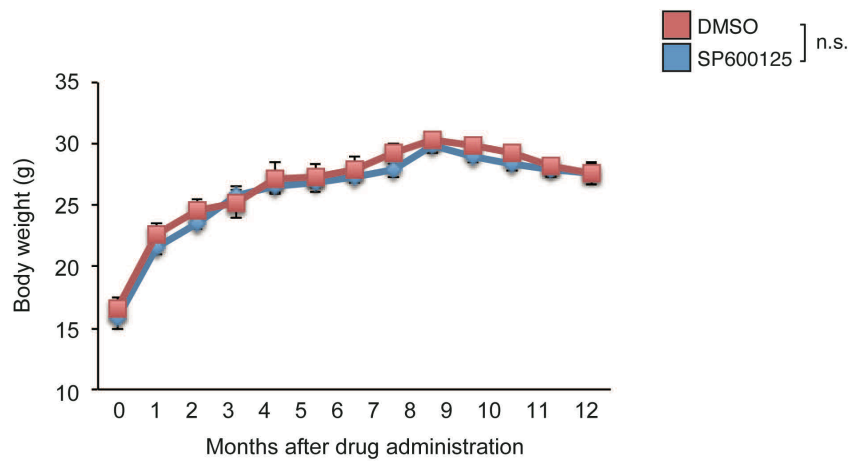

**b**

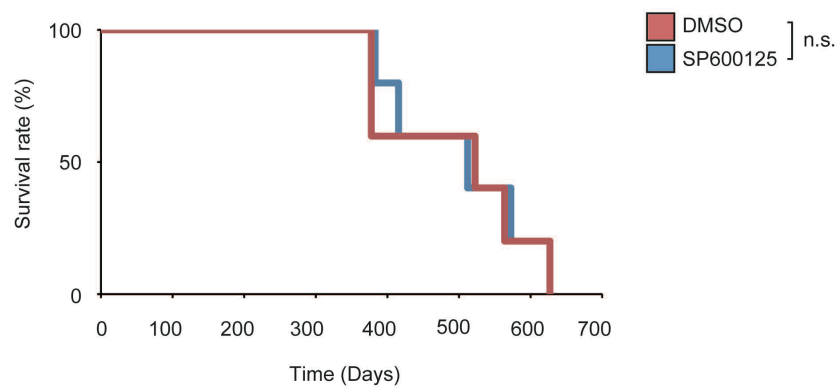

### **Supplementary Figure 15**

#### **Effect of systemic SP600125 administration on mouse body weight and survival.**

(a - b) Two groups of mice (5 per each group) were treated exactly as those in Fig. 5 (i.e., daily intraperitoneal administration of SP600125 [40 mg/kg/day] or the control vehicle [DMSO] for 10 consecutive days) except for intracranial implantation of stem-like glioblastoma cells. Body weight of the mice was monitored on a monthly basis (a) and survival was assessed by Kaplan-Meier analysis (b). Values in (a) represent mean  $\pm$  s.d. of 5 mice of each group. n.s., not statistically significant.



## Supplementary Figure 16

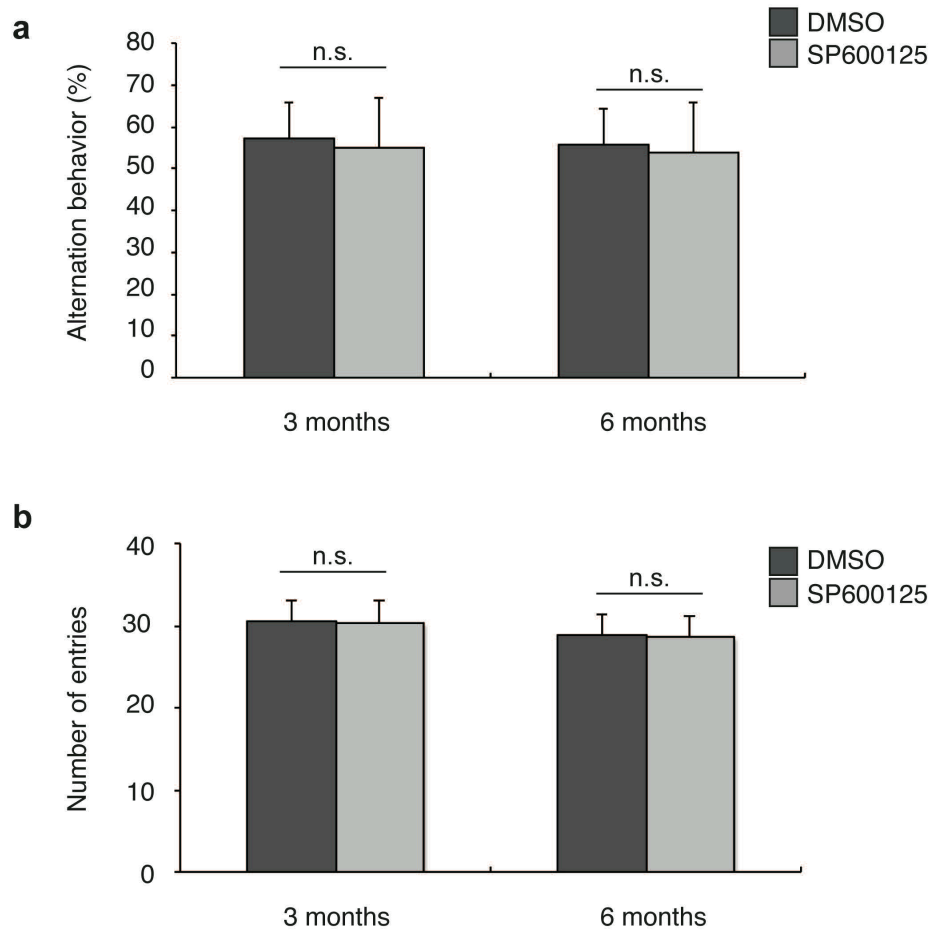

### **Supplementary Figure 16**

#### **Effect of systemic SP600125 administration on brain function as assessed by Y-maze test.**

(**a - b**) Mice (5 per each group) treated with either SP600125 or the control vehicle (DMSO) in Supplementary Fig. 15 were subjected to the Y-maze test at 3 and 6 months after drug treatment had concluded. The percentage of alternation behaviour (**a**) and the total number of arm entries during the session (**b**), an indicator of locomotor activity, are shown. Values represent mean  $\pm$  s.d. of 5 mice of each group. n.s., not statistically significant.

## Supplementary Figure 17

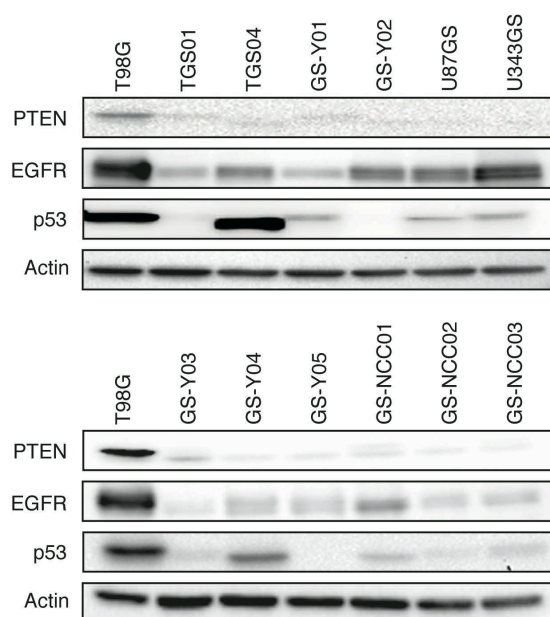

### **Supplementary Figure 17**

#### **Expression of PTEN, EGFR, and p53 in stem-like glioblastoma cells used in this study.**

Expression of PTEN, EGFR (truncated, variant III mutant), and p53 in stem-like glioblastoma cells used in this study was determined by immunoblot analysis. T98G, a serum-cultured, conventional human glioblastoma cell line, was used as a control for expression of PTEN, variant III mutant of EGFR, and mutated p53.
